# Supplementary material
Source: PubMed Central journal article supplement (PMC3259855)

## Supporting Information

**Figure S1:** CW EPR and Power saturation curves for KCNE1 mutants F54C, F57C, and L59C in POPC/POPG vesicles pH 7.2 298 K. CW spectra are normalized to total spin concentration to better portray the dynamic difference between trans-membrane residues.

Fig.  
S1

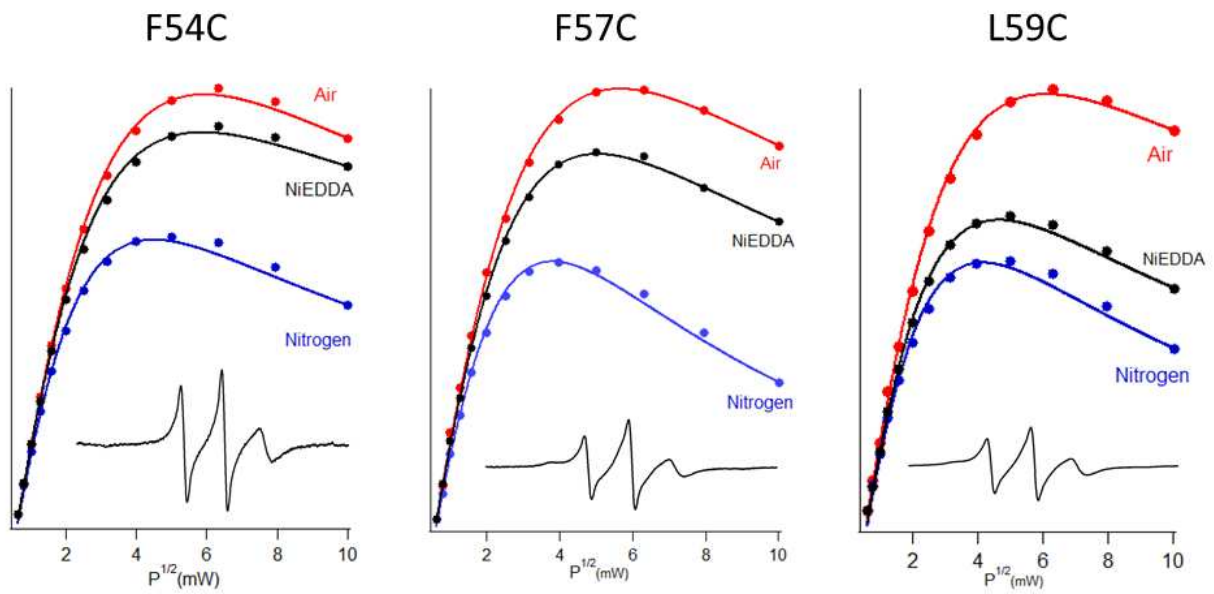

Supplement: NIHMS340319-supplement-1_si_001.pdf [file NIHMS340319-supplement-1_si_001.pdf]
